# Supplementary material for: Targeting Src attenuates peritoneal fibrosis and inhibits the epithelial to mesenchymal transition
Source: PubMed Central journal article supplement (PMC5663561; doi:10.18632/oncotarget.20040), 2017-08-08
Supplement: oncotarget-08-83872-s001.pdf [file oncotarget-08-83872-s001.pdf]

## Targeting Src attenuates peritoneal fibrosis and inhibits the epithelial to mesenchymal transition

### SUPPLEMENTARY MATERIALS

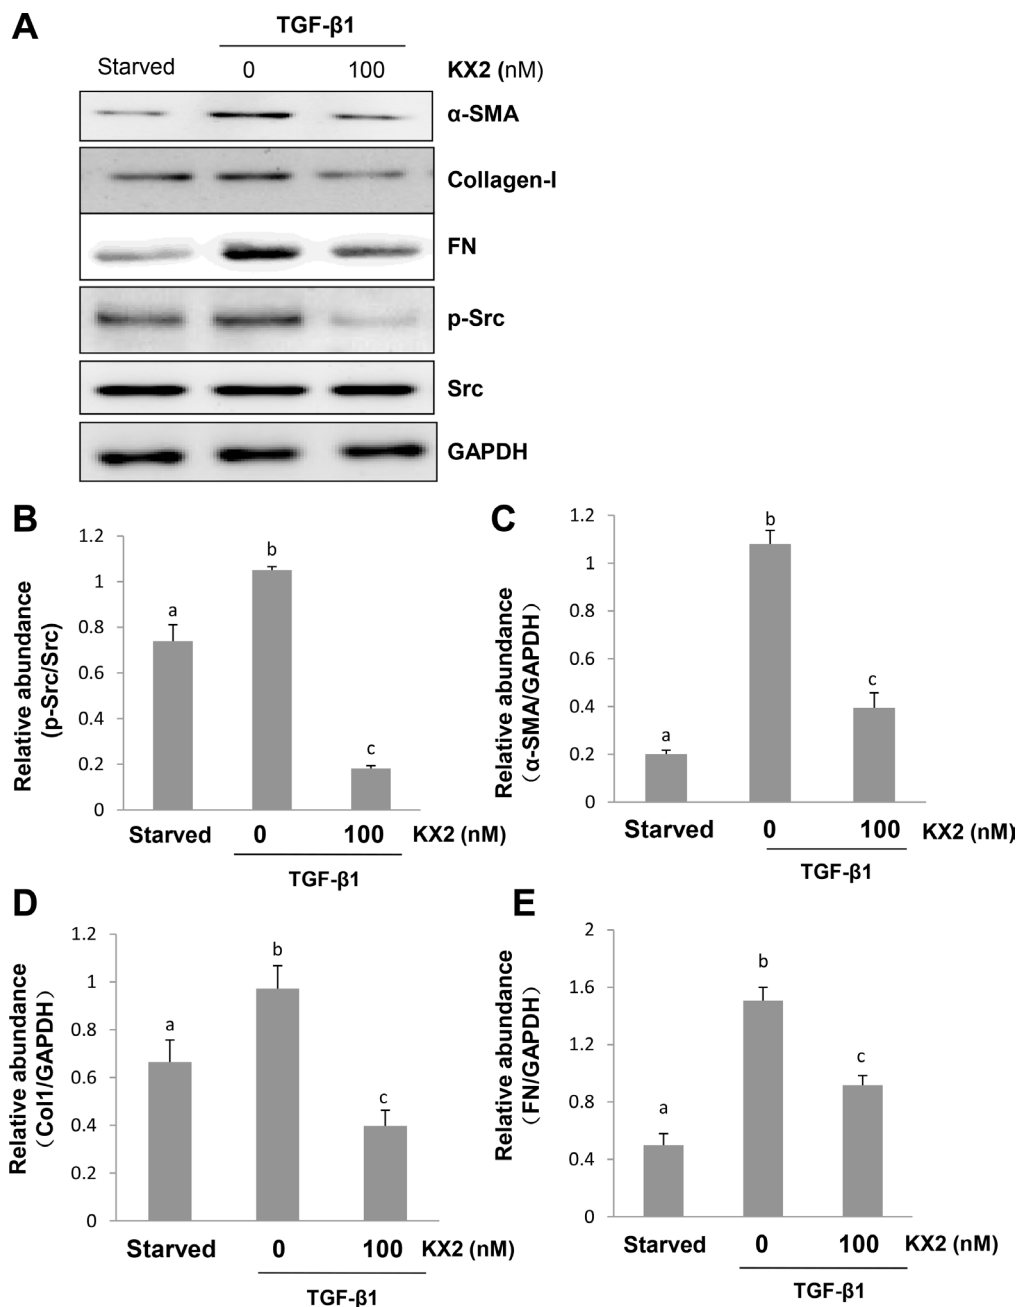

**Supplementary Figure 1: KX2-391 reduces transforming growth factor- $\beta$ 1 (TGF- $\beta$ 1)-induced expression of fibronectin (FN), collagen-I and  $\alpha$ -SMA in cultured human peritoneal mesothelial cells.** Serum-starved HPMCs were cultured with 2 ng/ml TGF- $\beta$ 1 for 24 h in the presence of KX2-391 (100 nM). (A) Cell lysates were subject to immunoblot analysis with antibodies to collagen I,  $\alpha$ -SMA, fibronectin, phospho-Src (p-Src), Src, and GAPDH. (B) Expression levels of p-Src were quantified by densitometry and normalized with Src. (C–E) Expression levels of indicated proteins were quantified by densitometry and normalized with GAPDH. Data are means  $\pm$  S.E.M. Bars with different letters (a–c) are significantly different from one another ( $P < 0.05$ ).
